# Supplementary material for: Influence of Sn content on the hydrogenation of crotonaldehyde catalysed by colloidally prepared PtSn nanoparticles
Source: Royal Society of Chemistry journal article supplement (doi:10.1039/c5cp00280j), 2015-01-01
Supplement: c5cp00280j1.pdf [file c5cp00280j1.pdf]

## Supplementary Information

### **Influence of Sn Content on the Hydrogenation of Crotonaldehyde Catalysed by Colloidally Prepared PtSn Nanoparticles**

Lena Altmann,<sup>[a]</sup> Xiaodong Wang,<sup>[b]</sup> Holger Borchert,<sup>[c]</sup> Joanna Kolny-Olesiak,<sup>[c]</sup> Volkmar Zielasek,<sup>[a]</sup> Jürgen Parisi,<sup>[c]</sup> Sebastian Kunz,<sup>\*[a]</sup> and Marcus Bäumer<sup>[a]</sup>

[a] Institute of Applied and Physical Chemistry and Center for Environmental Research and Sustainable Technology, University of Bremen Leobener Str. UFT, D-28359 Bremen (Germany)

[b] Technical Electrochemistry, Faculty of Chemistry Technische Universität München, Lichtenbergstrasse 4, D-85748 Garching, Germany

[c] Energy and Semiconductor Research Laboratory, Department of Physics, University of Oldenburg, Carl-von-Ossietzky-Str. 9-11, D-26129 Oldenburg (Germany)

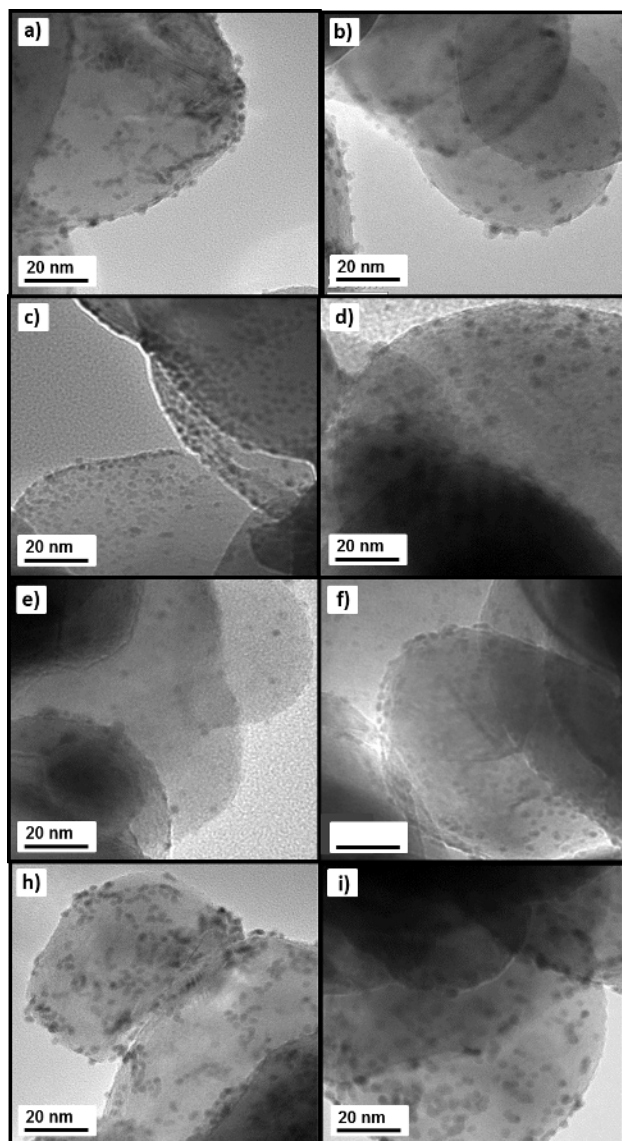

Figure S1: TEM Image of DDA-Pt/TiO<sub>2</sub>, DDA-PtSn(10)/TiO<sub>2</sub>, DDA-PtSn(23)/TiO<sub>2</sub> and DDA-PtSn(30)/TiO<sub>2</sub>, before catalysis a), c), e) and h) and after catalysis with reductive pre-treatment b), d), f) and i) respectively.
